# Supplementary material for: The Clinical Significance of Circulating Lymphocytes Morphology in Diffuse Large B-Cell Lymphoma As Determined by a Novel, Highly Sensitive Microscopy
Source: MDPI journal article supplement (doi:10.3390/cancers15235611), 2023-11-28
Supplement: s1 [file s1]

## Supplementary materials

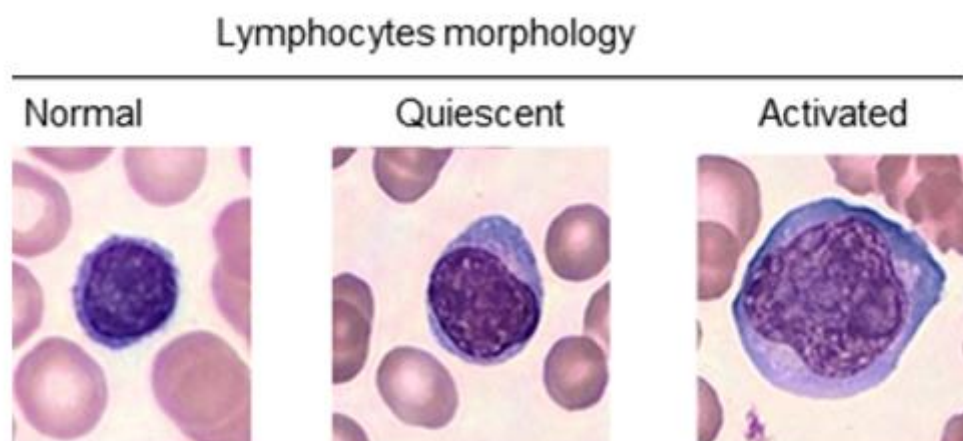

**Figure S1.** Lymphocytes morphology. Normal – normal morphology lymphocytes. Quiescent – A lymphocyte that passed the CAR T production process, but do not express the CAR. Activated – A lymphocyte that passed the CAR T production process, and mostly express CAR and engaged a target cell. Images were taken at 100 × magnification.

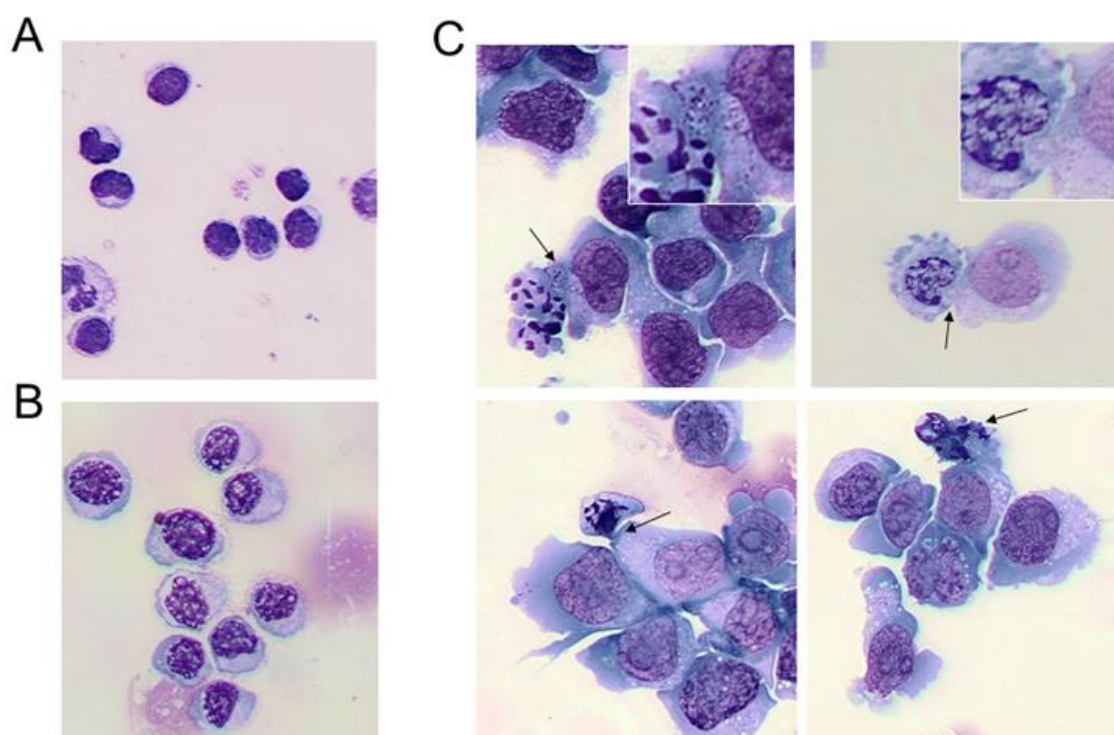

**Figure S2.** CAR T morphology during the production process. (A) Day 1 The cultures contained mostly normal morphology lymphocytes, and the rest were predominantly monocytes (B) Day 7. Un-transduced cultures. Most of the cells exhibited a quiescent morphology. (C) Day 8. Sorted CAR+ cells that incubated with target cells. Conjugates between activated morphology CAR T and apoptotic cells were observed (arrows), with granules in the CAR T concentrating within the conjugation area (top images, inserts). Images were taken at 40 × magnification.
